# Supplementary material
Source: PubMed Central journal article supplement (PMC506815)
Supplement: nar_32_13_3977__1.pdf [file nar_32_13_3977__1.pdf]

# Supplementary Material

The following ENSEMBL genes produced more than 5000 different putative transcript reconstructions:

ENSG00000004846  
ENSG00000005483  
ENSG00000008128  
ENSG00000008130  
ENSG00000008710  
ENSG00000010327  
ENSG00000049540  
ENSG00000070277  
ENSG00000072778  
ENSG00000075826  
ENSG00000077454  
ENSG00000080824  
ENSG00000081052  
ENSG00000086015  
ENSG00000092051  
ENSG00000092529  
ENSG00000095637  
ENSG00000096155  
ENSG00000096467  
ENSG00000099288  
ENSG00000100288  
ENSG00000100359  
ENSG00000100393  
ENSG00000100429  
ENSG00000100884  
ENSG00000101361  
ENSG00000102316  
ENSG00000103335  
ENSG00000104529  
ENSG00000104872  
ENSG00000106714  
ENSG00000108387  
ENSG00000111077  
ENSG00000111640  
ENSG00000111960  
ENSG00000114388  
ENSG00000115464  
ENSG00000115677  
ENSG00000121716  
ENSG00000123416  
ENSG00000124006  
ENSG00000125459  
ENSG00000127054  
ENSG00000130635

ENSG00000130653  
ENSG00000130702  
ENSG00000131503  
ENSG00000132781  
ENSG00000133124  
ENSG00000133943  
ENSG00000135502  
ENSG00000135596  
ENSG00000139720  
ENSG00000140416  
ENSG00000140983  
ENSG00000142621  
ENSG00000145017  
ENSG00000148396  
ENSG00000151914  
ENSG00000155229  
ENSG00000155288  
ENSG00000155657  
ENSG00000156976  
ENSG00000156983  
ENSG00000158142  
ENSG00000160752  
ENSG00000160796  
ENSG00000161912  
ENSG00000163702  
ENSG00000164692  
ENSG00000164896  
ENSG00000165282  
ENSG00000166377  
ENSG00000167798  
ENSG00000167978  
ENSG00000169031  
ENSG00000169231  
ENSG00000169436  
ENSG00000170638  
ENSG00000174483  
ENSG00000177380  
ENSG00000177728  
ENSG00000179889  
ENSG00000182199  
ENSG00000183050  
ENSG00000185596  
ENSG00000185624  
ENSG00000186015  
ENSG00000187243
